# Supplementary material for: Increased systemic and adipose 11β-HSD1 activity in idiopathic intracranial hypertension
Source: PubMed Central journal article supplement (PMC9346265; doi:10.1530/eje-22-0108), 2022-05-18
Supplement: supplementary_material.pdf [file supplementary_material.pdf]

| Metabolite ( $\mu\text{g}/24\text{hours}$ ) | Controls (N=17)         | IIH (N=27)              | P-value |
|---------------------------------------------|-------------------------|-------------------------|---------|
| <b>Androgen metabolites</b>                 |                         |                         |         |
| An                                          | 1302.3 (677.9-2153.9)   | 1469.5 (634.0-2974.0)   | 0.63    |
| Et                                          | 908.3 (595.1-1798.3)    | 1113.2 (470.8-1726.0)   | 0.92    |
| 11 $\beta$ -OH-An                           | 440.7 (304.2-957.9)     | 604.9 (268.1-937.8)     | 0.77    |
| <b>Androgen precursor metabolites</b>       |                         |                         |         |
| DHEA                                        | 124.9 (59.2-355.4)      | 201.5 (81.3-669.2)      | 0.26    |
| 16 $\alpha$ -OH-DHEA                        | 266.8 (112.0-886.5)     | 534.5 (177.8-1112.0)    | 0.24    |
| 5-PD                                        | 120.4 (84.0-203.4)      | 381.4 (204.8-486.8)     | 0.0018  |
| 5-PT                                        | 202.0 (85.0-271.0)      | 215.1 (114.1-352.1)     | 0.58    |
| <b>Mineralocorticoid metabolites</b>        |                         |                         |         |
| THA                                         | 83.3 (56.5-126.2)       | 81.2 (46.2-137.3)       | 0.83    |
| 5 $\alpha$ -THA                             | 101.5 (54.6-135.3)      | 59.0 (42.3-106.1)       | 0.13    |
| THB                                         | 81.1 (68.7-126.7)       | 98.7 (57.9-162.5)       | 0.45    |
| 5 $\alpha$ -THB                             | 247 (130.8-346.4)       | 180.1 (100.9-349.8)     | 0.77    |
| <b>Glucocorticoid precursor metabolites</b> |                         |                         |         |
| PD                                          | 158.5 (83.1-248.6)      | 164.8 (91.0-448.1)      | 0.45    |
| 17-HP                                       | 102.4 (40.5-126.8)      | 85.2 (41.6-167.6)       | 0.98    |
| PT                                          | 364.6 (256.3-453.1)     | 340.6 (160.4-622.5)     | >0.99   |
| PTONE                                       | 6.8 (4.6-11.2)          | 8.2 (5.6-17.5)          | 0.26    |
| THS                                         | 50.3 (34.1-75.3)        | 56.5 (36.8-100.9)       | 0.58    |
| <b>Total Glucocorticoid metabolites</b>     |                         |                         |         |
| Cortisol (F)                                | 45.8 (28.9-68.2)        | 71.1 (39.7-90.8)        | 0.015   |
| THF                                         | 1272.6 (864.3-1886.8)   | 1401.8 (882.5-1657.0)   | 0.88    |
| 5 $\alpha$ -THF                             | 1044.8 (697.2-1540.1)   | 1274.3 (749.0-1699.0)   | 0.43    |
| $\alpha$ -cortol                            | 330.1 (203.8-479.4)     | 292.6 (202.2-382.0)     | 0.56    |
| $\beta$ -cortol                             | 369.3 (294.6-443.6)     | 397.9 (300.1-525.7)     | 0.61    |
| 11 $\beta$ -OH-Et                           | 147.0 (79.8-439.5)      | 254.9 (92.4-424.4)      | 0.72    |
| Cortisone (E)                               | 74.5 (59.3-107.4)       | 95.7 (65.9-128.4)       | 0.33    |
| THE                                         | 2545.7 (1835.9-3889.3)  | 2769.6 (1314.0-3489.0)  | 0.75    |
| $\alpha$ -cortolone                         | 1357.1 (968.7-1868.6)   | 1200.6 (656.2-1520.0)   | 0.29    |
| $\beta$ -cortolone                          | 432.4 (354.0-837.2)     | 449.0 (282.0-786.9)     | 0.56    |
| 11-oxo-Et                                   | 231.3 (124.6-397.8)     | 276.0 (142.8-406.9)     | 0.63    |
| <b>Derivative measurements</b>              |                         |                         |         |
| 11 $\beta$ HSD1 (5 $\alpha$ THF+THF/THE)    | 0.9 (0.7-1.0)           | 1.1 (0.9-1.4)           | 0.042   |
| 11 $\beta$ -HSD2 (F/E)                      | 0.5 (0.4-0.6)           | 0.5 (0.4-0.6)           | 0.88    |
| Total GC metabolites                        | 8317.9 (5361.2-10096.0) | 8273.0 (4812.5-10459.5) | 0.76    |

**Table S1 Baseline Urinary Steroid Excretion**

Urinary steroid profiling on 24-hour urines from control (N=17) and IIH (N=27) patients as measured by GCMS. Abbreviations: An= androsterone; Et= etiocholanolone; 11 $\beta$ -OH-An= 11 $\beta$ -hydroxy-An; DHEA= dehydroepiandrosterone; 16 $\alpha$ -OH-DHEA= 16 $\alpha$ -hydroxy-DHEA; 5-

PT= Pregnenetriol; 5-PD= Pregnenediol; THA=Tetrahydro-11-dehydrocorticosterone; 5 $\alpha$ -THA= 5 $\alpha$ - Tetrahydro-11-dehydrocorticosterone; THB=Tetrahydrocorticosterone; 5 $\alpha$ -THB= 5 $\alpha$ - Tetrahydrocorticosterone; PD= Pregnenediol; 17-HP= 17-hydroxy-pregnanolone; PT= Pregnanetriol; PTONE= Pregnanetriolone; THS= Tetrahydro-11-deoxycortisol; THF= Tetrahydrocortisol; 11 $\beta$ -OH-Et = 11 $\beta$ -hydroxyetiocholanolone; THE= tetrahydrocortisone; 11-OXO-Et= 11-oxo-etiocholanolone; GC= glucocorticoid. Total glucocorticoid excretion is the sum of 5 $\alpha$ -THF + THF + THE + cortolones + cortols + cortisol + cortisone. N represents number of patients. Data presented as median (lower quartile-upper quartile). Mann-Whitney-U tests.

| Metabolite ( $\mu\text{g}/24\text{hours}$ ) | Baseline               |                        | 12 months              |                        | $\Delta$ 12 months from baseline |                        | P-value |
|---------------------------------------------|------------------------|------------------------|------------------------|------------------------|----------------------------------|------------------------|---------|
|                                             | CWM (N=16)             | Surgery (N=13)         | CWM (N=16)             | Surgery (N=13)         | CWM (N=16)                       | Surgery (N=13)         |         |
| <b>Androgen metabolites</b>                 |                        |                        |                        |                        |                                  |                        |         |
| An                                          | 1081.7 (696.2-2138.2)  | 679.2 (402.9-1850.1)   | 2288.4 (1003.0-4035)   | 1320.5 (709.8-2543.8)  | 908.0 (104.3-2062.5)             | 516.0 (-810.0-1731.5)  | 0.39    |
| Et                                          | 1665.1 (867.4-2093.3)  | 1502.9 (510.7-2276.7)  | 2112.7 (1469.5-3821.3) | 1674.9 (865.1-3458.0)  | 587.0 (-167.8-1550.0)            | 394.0 (-912.5-2373.5)  | 0.61    |
| 11 $\beta$ -OH-An                           | 612.9 (459.7-1014.4)   | 395.1 (122.5-956.8)    | 1725.8 (871.8-1965.76) | 1000.8 (524.5-1236.2)  | 752.0 (210.5-1142.0)             | 443.0 (-267.5-1020.5)  | 0.18    |
| <b>Androgen precursor metabolites</b>       |                        |                        |                        |                        |                                  |                        |         |
| DHEA                                        | 86.0 (38.4-363.5)      | 130.0 (79.8-363.9)     | 76.3 (28.9-257.2)      | 62.0 (22.4-130.4)      | -4.0 (-91.0-15.0)                | -82.0 (-253.0-24.0)    | 0.28    |
| 5-PD                                        | 43.7 (15.2-122.7)      | 20.5 (14.4-165.9)      | 40.7 (19.8-90.6)       | 38.2 (32.0-91.9)       | 23.5 (-38.3-58.3)                | 18.0 (-34.7-42.7)      | 0.28    |
| 5-PT                                        | 287.5 (178.9-431.5)    | 195.3 (122.8-324.2)    | 330.5 (218.2-719.5)    | 398.2 (272.9-660.1)    | 28.5 (-57.8-276.25)              | 178.0 (7.5-511.5)      | 0.89    |
| <b>Glucocorticoid precursor metabolites</b> |                        |                        |                        |                        |                                  |                        |         |
| PD                                          | 747.7 (312.9-2269.7)   | 568.7 (269.5-808-1)    | 982.5 (426.1-1671.4)   | 1389.3 (815.3-4912.1)  | 154.0 (-653.8-955.0)             | 669.0 (239-4061)       | 0.04    |
| 17-HP                                       | 189.2 (67.4-352.4)     | 91.7 (42.9-283.4)      | 138.1 (110.4-412.7)    | 345.6 (147.1-647.8)    | 48.0 (-17.5-143.0)               | 99.0 (-18.0-484.5)     | 0.32    |
| PT                                          | 741.5 (557.7-1562)     | 462.9 (281.4-961.9)    | 875.1 (590.9-1491.8)   | 701.2 (535.7-1517.9)   | 57.0 (-141.8-682.5)              | 233 (265.5-1178.0)     | 0.81    |
| THS                                         | 53.1 (39.9-78.6)       | 42.8 (26.4-61.8)       | 77.4 (51.5-100.6)      | 67.7 (42.3-121.7)      | 19.5 (-29.3-41.3)                | 26.9 (-16.5-74.0)      | 0.38    |
| <b>Total Glucocorticoid metabolites</b>     |                        |                        |                        |                        |                                  |                        |         |
| Cortisol (F)                                | 62.2 (38.1-76.1)       | 54.5 (27.1-98.2)       | 57.3 (44.7-95.4)       | 71.1 (48.2-85.2)       | -5.5 (-35.5-34.8)                | 14.0 (-38.0-44.0)      | 0.82    |
| THF                                         | 1799.8 (1251.7-2789.5) | 1845.8 (1063.7-3180.9) | 2192.8 (1727.1-3452.6) | 2243.2 (1174.4-2538.8) | 259.5 (-656.3-1324.5)            | 794.0 (-1575.5-1097.5) | 0.37    |
| 5 $\alpha$ -THF                             | 441.5 (225.8-549.3)    | 198.1 (106.7-491.0)    | 702.4 (488.2-1226.7)   | 420.8 (242.4-590.6)    | 197.5 (69.0-634.3)               | 221.0 (-321.5-396.5)   | 0.65    |

|                    |                        |                        |                        |                        |                        |                         |      |
|--------------------|------------------------|------------------------|------------------------|------------------------|------------------------|-------------------------|------|
| 11 $\beta$ -OH-Et  | 293.7 (132.9-517.1)    | 216.6 (72.3-534.5)     | 340.9 (65.1-879.8)     | 248.9 (104.9-538.7)    | -0.5 (-296.3-591.0)    | -7.0 (-305.5-131.5)     | 0.62 |
| Cortisone (E)      | 72.4 (46.8-106.3)      | 71.8 (36.8-102.7)      | 93.3 (74.1-172.9)      | 102.7 (55.6-161.5)     | 28.0 (-25.3-79.5)      | 38.0 (-34.5- 91.0)      | 0.93 |
| THE                | 2936.4 (2200.1-3758.8) | 2891.8 (1249.8-3749.9) | 4368.1 (3446.7-6829.9) | 3526.6 (2100.5-5618.0) | 1227.0 (-463.3-2969.3) | 1762.0 (.1337.5-2863.5) | 0.87 |
| $\beta$ -cortolone | 780.2 (585.7-1056.7)   | 537.9 (332.3-786.8)    | 1694.3 (1220.1-2490.6) | 1398.6 (791.3-2064.7)  | 725.5 (293.0-1531.5)   | 869.0 (171.0-1274.5)    | 0.68 |

**Derivative measurements**

|                                          |                         |                        |                          |                      |                     |                    |      |
|------------------------------------------|-------------------------|------------------------|--------------------------|----------------------|---------------------|--------------------|------|
| 11 $\beta$ HSD1 (5 $\alpha$ THF+THF/THE) | 0.8 (0.7-0.9)           | 0.9 (0.8-1.1)          | 0.7 (0.6-0.8)            | 0.6 (0.5-0.7)        | --0.15 (-0.19-0.01) | -0.25 (-0.36-0.03) | 0.01 |
| 11 $\beta$ -HSD2 (F/E)                   | 0.8 (0.6-1.0)           | 0.8 (0.6-1.0)          | 0.6 (0.5-0.6)            | 0.6 (0.5-0.8)        | -0.24 (-0.29-0.05)  | -0.17 (-0.32-0.03) | 0.09 |
| Total GC metabolites                     | 9170.7 (7043.9-12640.2) | 8403.1 (3693.7-9828.3) | 11515.4 (9426.1-18912.1) | 11365 (8017-15110.6) | 2380 (-1849-6914)   | 4574 (-3670-10600) | 0.82 |

## Table S2 Weight Loss Urinary Steroid Excretion

Urinary steroid profiling via LCMS on 24-hour urines from IIH patients randomised to community weight management (CWM) (N=16) and bariatric surgery (N=13) at baseline and 12 months after baseline. Abbreviations: An= androsterone; Et= etiocholanolone; 11 $\beta$ -OH-An= 11 $\beta$ -hydroxy-An; DHEA= dehydroepiandrosterone;; 5-PT= Pregnenetriol; 5-PD= Pregnenediol; PD= Pregnenediol; 17-HP= 17-hydroxy-pregnanolone; PT= Pregnanetriol; THS= Tetrahydro-11-deoxycortisol; THF= Tetrahydrocortisol; THE= tetrahydrocortisone; Total glucocorticoid excretion is the sum of 5 $\alpha$ -THF + THF + THE + cortolones + cortols + cortisol + cortisone; GC= glucocorticoid. N represents number of patients. Data presented as median (lower quartile-upper quartile). Mann-Whitney-U tests between surgery and CWM on  $\Delta$  12 month from baseline.
